# Supplementary material for: The electrochemical sensor Au@MOF-79 toward the quercetin detection in seawater
Source: Research Square preprint supplement (doi:10.21203/rs.3.rs-7609951/v1), 2025-10-09
Supplement: Supplementary file 1 [file 8c3a3f53c9aca24f8d24e311.docx]

Supporting information for

The electrochemical sensor Au@MOF-79 toward the quercetin detection in seawater

Fangzheng Duan1, Huimin Yang1, Chunyu Qiao1, Peng Lin1,* and Qi Ge2,*

1 College of Material Science and Engineering, Heilongjiang Institute of Technology, Harbin 150088, P. R. China

2 College of Civil & Architecture, Heilongjiang Institute of Technology, Harbin 150088, P. R. China

Table S1 Comparison of analytical parameters for the determination of quercetin at different modified electrodes

| **Electrode** | **Linear range (M)** | **LOD(M)** | **References** | | |
| --- | --- | --- | --- | --- | --- |
| CD/AuNPs/MWCNTs/GCE | 5.0×10-9 -7.0×10-6 | 6.4×10-9 | | 1 |
| Au-Co@NCNHP/GCE | 0.050×10-6-35.00×10-6 | 0.023±0.002×10-6 | | 2 |
| WS2/GCE | 10×10-9-50×10-6 | 1.2×10-6 | | 3 |
| Au-PAF-6/GCE | 1×10-12-6×10-10 | 2×10-13 | | 4 |
| AgNPs@g-CN/GCE | 1.0×10-8-1.2×10-4 | 6.0×10-9 | | 5 |

Table S2 Determination of Que in actual samples (n = 3).

| **Sample** | **Added (μM)** | **Founded (μM)** | | | **Recovery (%)** | | | **RSD** |
| --- | --- | --- | --- | --- | --- | --- | --- | --- |
| Sea water | 30.4 | 36.1 | 35.3 | 34.6 | 118.0 | 116.0 | 113.0 | 2.1 |
| 87.4 | 93.7 | 90.2 | 86.7 | 107.0 | 103.0 | 99.0 | 3.8 |
| 105.7 | 104.9 | 99.0 | 98.0 | 99.2 | 93.6 | 92.7 | 3.7 |

References

1. Kan X, Zhang Ti, Zhong M, Lu X (2016) CD/AuNPs/MWCNTs based electrochemical sensor for quercetin dual-signal detection. Biosens Bioelectron 77: 638-643.
2. Luo G, Deng Y, Zhu L, Liu J, Zhang B, Zhang Y, Sun W, Li G (2020) Au-Co nanoparticles-embedded N-doped carbon nanotube hollow polyhedron modified electrode for electrochemical determination of quercetin. Microchim Acta 187:546.
3. Durai L, Kong C, Badhulika S (2020) One-step solvothermal synthesis of nanoflake-nanorod WS2 hybrid for non-enzymatic detection of uric acid and quercetin in blood serum. Mater Sci Eng C 107:110217.
4. Vilian ATE, Puthiaraj P, Kwak CH, Choe SR, Huh YS, Ahn WS. Han YK (2016) Electrochemical determination of quercetin based on porous aromatic frameworks supported Au nanoparticles. Electrochim Acta 216:181-187.
5. Veerakumar P, Rajkumar C, Chen S, Thirumalraj B, Lin KC (2018) Ultrathin 2D graphitic carbon nitride nanosheets decorated with silver nanoparticles for electrochemical sensing of quercetin. J Electroanal Chem 826:207-216.
